# Supplementary material for: Technical Evaluation: Identification of Pathogenic Mutations in PKD1 and PKD2 in Patients with Autosomal Dominant Polycystic Kidney Disease by Next-Generation Sequencing and Use of a Comprehensive New Classification System
Source: PLoS One. 2016 Nov 11;11(11):e0166288. doi: 10.1371/journal.pone.0166288 (PMC5105999; doi:10.1371/journal.pone.0166288)
Supplement: S4 Table — (XLS) [file pone.0166288.s006.xls]

## Sheet: S4 Table
		S4 Table. Details of definitely pathogenic mutations of the PKD1 and PKD2 genes in Japanese patients with ADPKD
		Subject ID	Gene	Exon	cDNA change	Amino acid change	Known/Novel	Mutation pattern
		U461	PKD1	4	c.445C>T	p.Q149X	Novel	nonsense mutation
		Y3712	PKD1	15	c.4306C>T	p.R1436X	Known	nonsense mutation
		F8199	PKD1	15	c.5678G>A	p.W1893X	Novel	nonsense mutation
		M248	PKD1	17	c.7164C>G	p.Y2388X	Novel	nonsense mutation
		I8416	PKD1	18	c.7372G>T	p.E2458X	Known	nonsense mutation
		R1517	PKD1	36	c.10808G>A	p.W3603X	Known	nonsense mutation
		X2030	PKD1	43	c.11808G>A	p.W3936X	Novel	nonsense mutation
		R4832	PKD1	43	c.11884C>T	p.Q3962X	Known	nonsense mutation
		M4622	PKD1	46	c.12712C>T	p.Q4238X	Known	nonsense mutation
		Y8888	PKD1	46	c.12646C>T	p.Q4216X	Known	nonsense mutation
		C9636	PKD2	4	c.933T>G	p.Y311X	Novel	nonsense mutation
		I5408	PKD2	9	c.1960C>T	p.R654X	Known	nonsense mutation
		Z9486	PKD2	13	c.2506InsA	p.Y836X	Novel	nonsense mutation
		A5091	PKD1	5	c.699_703del5	p.G233fs25X	Novel	frameshift
		B4547	PKD1	5	c.699_703del5	p.G233fs25X	Novel	frameshift
		L919	PKD1	5	c.846_852del7	p.G282fs5X	Novel	frameshift
		Q104	PKD1	6	c.1241delC	p.414fs50X	Novel	frameshift
		J4323	PKD1	15	c.4624_4625delGT	p.V1542fs34X	Novel	frameshift
		N3642	PKD1	15	c.4376delT	p.L1459fs74X	Novel	frameshift
		R6808	PKD1	15	c.5851_5854delCCCG	p.R1951fs5X	Novel	frameshift
		I8955	PKD1	15	c.5014_5015delAG	p.R1672fs98X	Known	frameshift
		J8563	PKD1	15	c.5014_5015delAG	p.R1672fs98X	Known	frameshift
		W8016	PKD1	15	c.5628_5640del13	p.S1876fs	Novel	frameshift
		G5889	PKD1	15	c.5968_5969delAG	p.R1990fs58X	Known	frameshift
		C5274	PKD1	15	c.4369_4370delTC	p.S1457fs64X	Known	frameshift
		D3655	PKD1	15	c.4421insT	p.N1474fs48X	Novel	frameshift
		N2343	PKD1	15	c.5014_5015delAG	p.R1672fs98X	Known	frameshift
		W5030	PKD1	15	c.5014_5015delAG	p.R1672fs98X	Known	frameshift
		N669	PKD1	15	c.6930delG	p.R2310fs26X	Novel	frameshift
		D5946	PKD1	16	c.7000_7001ins7	p.V2334fs	Known	frameshift
		M5934	PKD1	21	c.7927delC	p.R2643fs10X	Known	frameshift
		M9515	PKD1	21	c.7948_7949delCT	p.L2650fs9X	Known	frameshift
		S6822	PKD1	23	c.8427delC	p.P2809fs65X	Novel	frameshift
		H6109	PKD1	23	c.8689InsC	p.V2897fs39X	Novel	frameshift
		U4026	PKD1	23	c.8351insC	p.Q2784fs37X	Novel	frameshift
		S9713	PKD1	23	c.8369delC	p.P2790fs83X	Novel	frameshift
		J1591	PKD1	25	c.9097delC	p.L3033fs39X	Novel	frameshift
		X2242	PKD1	27	c.9513delC	p.A3171fs142X	Novel	frameshift
		B3376	PKD1	29	c.9755_9756delAG	p.E3252fs6X	Novel	frameshift
		O140	PKD1	37	c.10966delC	p.L3656fs28X	Novel	frameshift
		H2342	PKD1	43	c.11961ins5	p.A3987fs53X	Novel	frameshift
		X2243	PKD1	46	c.12613_12690del77insA	p.G4205_N4230indel/fs	Novel	frameshift
		H7586	PKD2	1	c.416delG	p.R139fs93X	Novel	frameshift
		V1316	PKD2	5	c.1306_1319＋30del44	p.F436_R440del/fs	Novel	frameshift
		B8197	PKD2	6	c.1466insG	p.V489fs36X	Novel	frameshift
		G472	PKD2	10	c.2102insT	p.S701fs14X	Novel	frameshift
		P1142	PKD1	IVS2	c.288-2A>G	p.Asp97_Ile120del	Known	typical splicing
		V131	PKD1	IVS15	c.6916-9G>A	p.Q2305fs10X	Known	typical splicing
		E3152	PKD1	3	deletion detected by MLPA			large rearrangement
		A1403	PKD1	3	deletion detected by MLPA			large rearrangement
		A9150	PKD1	40	deletion detected by MLPA			large rearrangement
		L5530	PKD1	29-30	deletion detected by MLPA			large rearrangement
